# Supplementary material for: Nanostructured manganese oxide/carbon nanotubes, graphene and graphene oxide as water-oxidizing composites in artificial photosynthesis
Source: Royal Society of Chemistry journal article supplement (doi:10.1039/c4dt01295j), 2014-01-01
Supplement: c4dt01295j2.pdf [file c4dt01295j2.pdf]

| Compound                                            | Oxidant                            | TOF<br>mmol<br>O <sub>2</sub> /mol Mn | References |
|-----------------------------------------------------|------------------------------------|---------------------------------------|------------|
| Optimistic Ca-Mn oxide                              | Ce(IV)                             | 3.0                                   | 27         |
| Nano scale Mn oxide within NaY zeolite              | Ce(IV)                             | 2.62                                  | 28         |
| Layered Mn-calcium oxide                            | Ce(IV)                             | 2.2                                   | 29         |
| Nanolayered Mn oxide/CNT,G or GO                    | Ce(IV)                             | 0.5-2.6                               | This work  |
| Layered Mn-Al, Zn, K, Cd and Mg oxide               | Ce(IV)                             | 0.8-2.2                               | 30,31      |
| CaMn <sub>2</sub> O <sub>4</sub> ·H <sub>2</sub> O  | Ce(IV)                             | 0.54                                  | 32         |
| Amorphous Mn                                        | Ru(bpy) <sub>3</sub> <sup>3+</sup> | 0.06                                  | 33         |
| Oxides                                              | Ce(IV)                             | 0.52                                  |            |
| CaMn <sub>2</sub> O <sub>4</sub> ·4H <sub>2</sub> O | Ce(IV)                             | 0.32                                  | 32         |
| Mn oxide nanoclusters                               | Ru(bpy) <sub>3</sub> <sup>3+</sup> | 0.28                                  | 34         |
| Mn oxide-coated montmorillonite                     | Ce(IV)                             | 0.22                                  | 35         |
| Nano-sized α-Mn <sub>2</sub> O <sub>3</sub>         | Ce(IV)                             | 0.15                                  | 22b        |
| Octahedral Molecular Sieves                         | Ru(bpy) <sub>3</sub> <sup>3+</sup> | 0.11                                  | 33         |
|                                                     | Ce(IV)                             | 0.05                                  |            |
| MnO <sub>2</sub> (colloid)                          | Ce(IV)                             | 0.09                                  | 36         |
| α-MnO <sub>2</sub> nanowires                        | Ru(bpy) <sub>3</sub> <sup>3+</sup> | 0.059                                 | 37         |
| CaMn <sub>3</sub> O <sub>6</sub>                    | Ce(IV)                             | 0.046                                 | 38         |
| CaMn <sub>4</sub> O <sub>8</sub>                    | Ce(IV)                             | 0.035                                 | 39         |
| α-MnO <sub>2</sub> nanotubes                        | Ru(bpy) <sub>3</sub> <sup>3+</sup> | 0.035                                 | 37         |
| Mn <sub>2</sub> O <sub>3</sub>                      | Ce(IV)                             | 0.027                                 | 32         |
| β-MnO <sub>2</sub> nanowires                        | Ru(bpy) <sub>3</sub> <sup>3+</sup> | 0.02                                  | 37         |
| Ca <sub>2</sub> Mn <sub>3</sub> O <sub>8</sub>      | Ce(IV)                             | 0.016                                 | 39         |
| CaMnO <sub>3</sub>                                  | Ce(IV)                             | 0.012                                 | 39         |
| Nano-sized λ-MnO <sub>2</sub>                       | Ru(bpy) <sub>3</sub> <sup>3+</sup> | 0.03                                  | 40         |
| Bulk α-MnO <sub>2</sub>                             | Ru(bpy) <sub>3</sub> <sup>3+</sup> | 0.01                                  | 37         |
| Mn Complexes                                        | Ce(IV)                             | 0.01-0.6                              | 41-42      |
| PSII                                                | Sunlight                           | 100-400 × 10 <sup>3</sup>             | 43,44      |
